# Supplementary material
Source: Springer Nature journal article supplement (https://www.springermedizin.de/resource/supplementary/12961_2008_74_MOESM1_ESM.pdf/9571378)
Supplement: MOESM1 [file 9571378]

| <b>COMPLEX SYSTEM / HUMAN BODY</b>                                                                                                           | <b>HEALTH CARE</b>                                                                   | <b>SOLUTIONS</b>                                                                                                        |
|----------------------------------------------------------------------------------------------------------------------------------------------|--------------------------------------------------------------------------------------|-------------------------------------------------------------------------------------------------------------------------|
| 1. Numerous & variable <u>components</u> which generate system's <u>emergence</u> /value; all <u>components participate</u>                  | Not all are included; value is inconsistent; unfocused responsibility [22-24]        | All must be included; greater value to be created; responsibility for health-from individual to society                 |
| 2. <u>Relationships</u> optimize system with <u>feedback loops</u><br><u>Organized complexity</u> characterizes function                     | Relationships are not pro-system<br>Disorganized complexity [23-25]                  | Integrate all relationships<br>Reestablish organized complexity                                                         |
| 3. <u>Communication is reciprocal</u> and resembles a <u>self-learning</u> neuro-net                                                         | Communication is non-uniform; choices are not based on existing knowledge [23,26-30] | Interoperability of communication; life-long education                                                                  |
| 4. System seeks <u>homeostasis/steady state</u>                                                                                              | Choices override system needs                                                        | Set energy balance via diet/exercise/stress management; track fitness/performance status;* increase epigenetic research |
| 5. Balance of function/dysfunction leads to <u>cost/energy stability</u>                                                                     | Health/disease imbalance increases cost/energy loss [23,26-30]                       | Combine life and health insurance                                                                                       |
| 6. Horizontal and vertical <u>hierarchies</u> are reciprocal                                                                                 | Vertical hierarchy controls [24,31]                                                  | Reestablish reciprocity; create system-optimizing policies/tort/ research support                                       |
| 7. <u>Boundary is semipermeable</u> ; in synch with external environment                                                                     | Boundary is defective; poor adaptation to environment                                | Reestablish semipermeability; flexible adaptation**                                                                     |
| 8. All- <u>systems relatedness</u> exists                                                                                                    | Many systems don't relate [26]                                                       | Connect all systems                                                                                                     |
| 9. Systems change with <u>cycles</u>                                                                                                         | Diffuse asynchrony [32]                                                              | Synchronize system with other systems/cycles (ecologic, climate)                                                        |
| 10. Systems' cycles are intelligently <u>reset</u>                                                                                           | Resetting through crises [6]                                                         | Introduce rational resetting                                                                                            |
| 11. Systems are of <u>proportionate size</u> to maintain viability of feedback loops, semipermeability of boundary, and actionable resetting | Disproportionality exists [30]                                                       | Allow re-sizing of healthcare units/subsystems through self-organization                                                |
| 12. Systems show <u>balanced growth</u> as outcome of reciprocal hierarchies                                                                 | Imbalanced growth [33]                                                               | Formulate mission/goals/ authority/functional space for each hierarchy                                                  |

Additional file 1: Comparison of features between a Complex System, mirrored in the Human Body, and Health care with corrective Solutions. (\*endurance, speed, strength and flexibility) (\*\*impartial regulation seeking optimal functioning of the system)
